# Supplementary material for: Effect of N-acetyl cysteine coated CdS:Mn/ZnS quantum dots on seed germination and seedling growth of snow pea (Pisum sativum L.): imaging and spectroscopic studies
Source: Royal Society of Chemistry journal article supplement (doi:10.1039/c4en00198b), 2015-01-01
Supplement: c4en00198b1.pdf [file c4en00198b1.pdf]

| NAC coated CdS:Mn/ZnS Treatment( $\mu\text{g/ml}$ ) | Normal Seed      | Abnormal Seed   | No Germination |
|-----------------------------------------------------|------------------|-----------------|----------------|
| 0                                                   | 20 <sup>d</sup>  | 0 <sup>a</sup>  | 0              |
| 2                                                   | 16 <sup>cd</sup> | 4 <sup>ab</sup> | 0              |
| 5                                                   | 13 <sup>b</sup>  | 6 <sup>c</sup>  | 0              |
| 10                                                  | 14 <sup>bc</sup> | 5 <sup>c</sup>  | 0              |
| 20                                                  | 16 <sup>bc</sup> | 5 <sup>bc</sup> | 0              |
| 40                                                  | 17 <sup>d</sup>  | 3 <sup>a</sup>  | 0              |
| 60                                                  | 18 <sup>d</sup>  | 2 <sup>a</sup>  | 0              |
| 80                                                  | 17 <sup>d</sup>  | 2 <sup>a</sup>  | 0              |
| 100                                                 | 18 <sup>d</sup>  | 2 <sup>a</sup>  | 0              |

**Supplementary Table 1.** Values are mean of three replicates  $\pm$  SD, number in the same column followed by same letter are not significantly different at  $P < 0.05$

| NAC coated CdS:Mn/ZnS Treatment( $\mu\text{g/ml}$ ) | Germination % | Morphological Characteristics                              |
|-----------------------------------------------------|---------------|------------------------------------------------------------|
| 0                                                   | 100           | Healthy & Normal Growth                                    |
| 2                                                   | 100           | Healthy & Normal Growth                                    |
| 5                                                   | 100           | Healthy & Normal Growth                                    |
| 10                                                  | 100           | Enhanced Root & Hypocotyl Length                           |
| 20                                                  | 100           | Enhanced Root & Hypocotyl Length                           |
| 40                                                  | 100           | Enhanced Root & Hypocotyl Length                           |
| 60                                                  | 80            | Reduced growth & germination, Brown coloration of root tip |
| 80                                                  | 80            | Reduced growth & germination, Brown coloration of root tip |
| 100                                                 | 70            | Reduced growth & germination, Brown coloration of root tip |

**Supplementary Table 2.** Effect of different NAC coated CdS:Mn/ZnS Treatment on germination and morphological characteristics
